# Supplementary material
Source: publisher figshare collection journal article supplement (https://sage.figshare.com/ndownloader/files/25876902)
Supplement: Supplementary file 1 [file 25876902]

## Sheet: summary
Summary of multivariable logistic regressions by first run support type predicting final run mortality using first run factors.
N used	N used =459						N used =870					N used =267
Mode c statistics	c=0.589						c=0.664					c =0.649
Support type = Pumonary						Support type = Cardiac						Support type =ECPR
Odds Ratio Estimates						Odds Ratio Estimates						Odds Ratio Estimates
Effect	Point Estimate	95% Wald Confidence Limits		Pr > ChiSq		Effect	Point Estimate	95% Wald Confidence Limits		Pr > ChiSq		Effect	Point Estimate	95% Wald Confidence Limits		Pr > ChiSq
RunNo	0.952	0.482	1.881	0.8886		RunNo	1.602	1.014	2.53	0.0434		RunNo	1.544	0.666	3.58	0.3112
Run1_comp_Renal Yes vs No	1.075	0.713	1.62	0.7312		Run1_comp_Renal Yes vs No	1.775	1.304	2.417	0.0003		Run1_comp_Renal Yes vs No	2.244	1.308	3.85	0.0033
Run1_agecat Neonatal vs Pediatric	1.71	0.975	3	0.0612		Run1_agecat Neonatal vs Pediatric	1.813	1.274	2.58	0.0009		Run1_agecat Neonatal vs Pediatric	1.351	0.755	2.418	0.3116
Run1_agecat Neonatal vs Adult	1.092	0.431	2.765	0.8526		Run1_agecat Neonatal vs Adult	0.595	0.262	1.355	0.2165		Run1_agecat Neonatal vs Adult	0.533	0.113	2.519	0.427
Run1_agecat Pediatric vs Adult	0.639	0.275	1.484	0.297		Run1_agecat Pediatric vs Adult	0.328	0.159	0.677	0.0025		Run1_agecat Pediatric vs Adult	0.394	0.098	1.58	0.189
Weight	0.993	0.982	1.004	0.1893		Weight	0.989	0.98	0.999	0.0266		Weight	0.997	0.981	1.013	0.6773
Run1_ventb4cat 15-131 vs <15	1.12	0.734	1.709	0.5988		Run1_ventb4cat 15-131 vs <15	1.38	1.002	1.9	0.0483		Run1_ventb4cat 15-131 vs <15	1.509	0.833	2.732	0.1743
Run1_ventb4cat >131 vs <15	1.469	0.817	2.64	0.1992		Run1_ventb4cat >131 vs <15	2.077	1.287	3.353	0.0028		Run1_ventb4cat >131 vs <15	1.348	0.639	2.845	0.4329
